# Supplementary figures and images for: Integrated Analysis of lncRNA and mRNA Reveals Novel Insights into Wool Bending in Zhongwei Goat
Source: MDPI journal article supplement (doi:10.3390/ani11113326), 2021-11-22

Supplementary Materials:

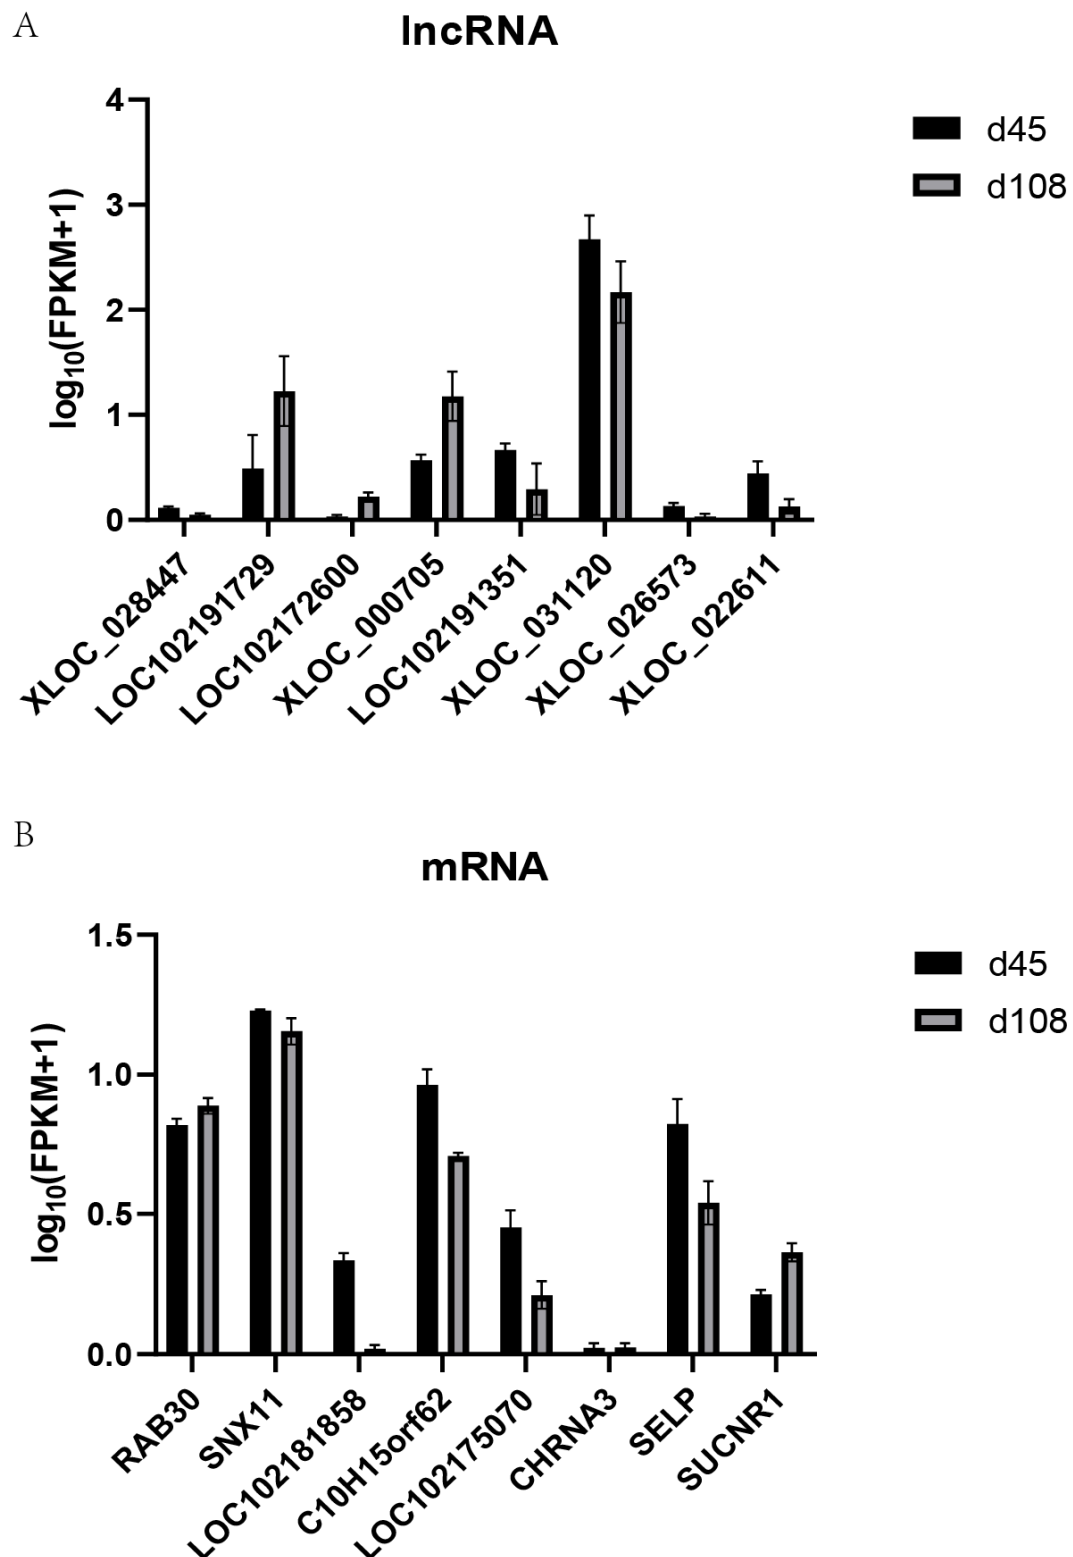

Figure S1: Sequencing results Normalized lncRNA and mRNA expression

Supplement: s1 [file s1]
